# Supplementary material
Source: publisher figshare collection journal article supplement (https://acs.figshare.com/ndownloader/files/20509830)
Supplement: Supplementary file 1 [file 20509830]

# Descriptors for Electron and Hole Charge Carriers in Metal Oxides

Daniel W. Davies,<sup>\*,†,||</sup> Christopher N. Savory,<sup>‡,||</sup> Jarvist M. Frost,<sup>¶</sup> David O. Scanlon,<sup>‡,||</sup> Benjamin J. Morgan,<sup>§,||</sup> and Aron Walsh<sup>\*,†,||</sup>

<sup>†</sup>*Department of Materials, Imperial College London, London SW7 2AZ, United Kingdom*

<sup>‡</sup>*Department of Chemistry, University College London, 20 Gordon Street, London WC1H 0AJ, United Kingdom*

<sup>¶</sup>*Department of Physics, Imperial College London, London SW7 2AZ, UK*

<sup>§</sup>*Department of Chemistry, University of Bath, Claverton Down, Bath BA2 7AY, United Kingdom*

<sup>||</sup>*The Faraday Institution, Quad One, Harwell Science and Innovation Campus, Didcot, UK*

<sup>⊥</sup>*Diamond Light Source Ltd., Diamond House, Harwell Science and Innovation Campus, Didcot, Oxfordshire OX11 0DE, United Kingdom*

<sup>#</sup>*Department of Materials Science and Engineering, Yonsei University, Seoul 03722, Korea*

E-mail: d.davies16@imperial.ac.uk; a.walsh@imperial.ac.uk

## Supplementary Information

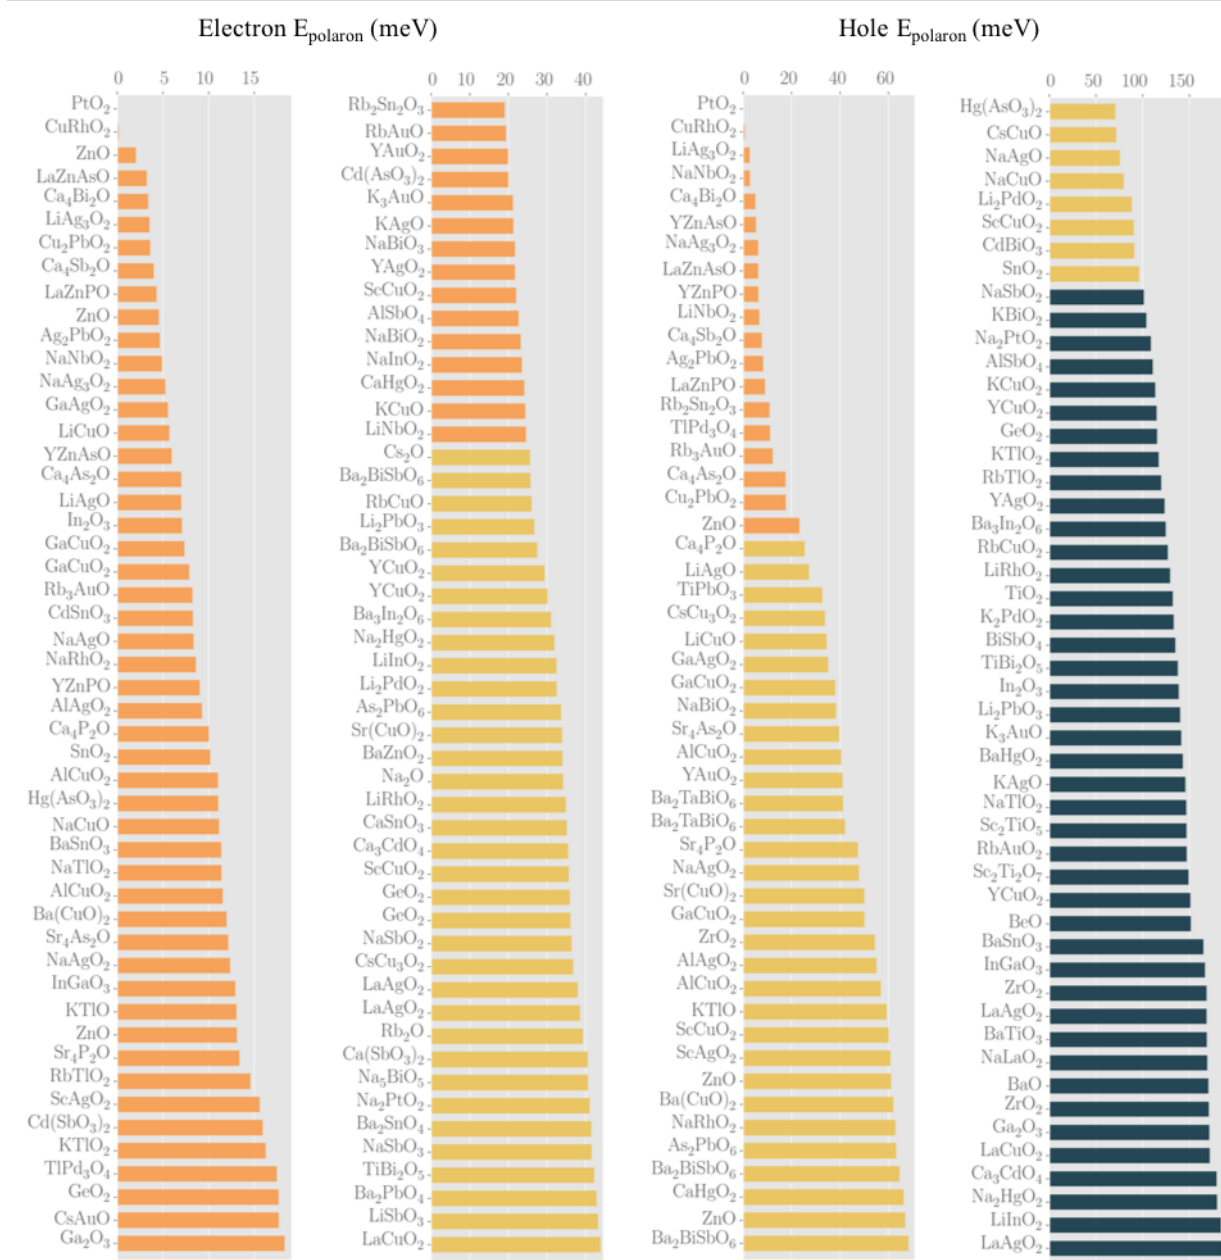

Figure S1: Electron and hole polaron binding energies calculated using the effective masses and dielectric constants from public data-sets. Some compositions have multiple entries due to polymorphism.

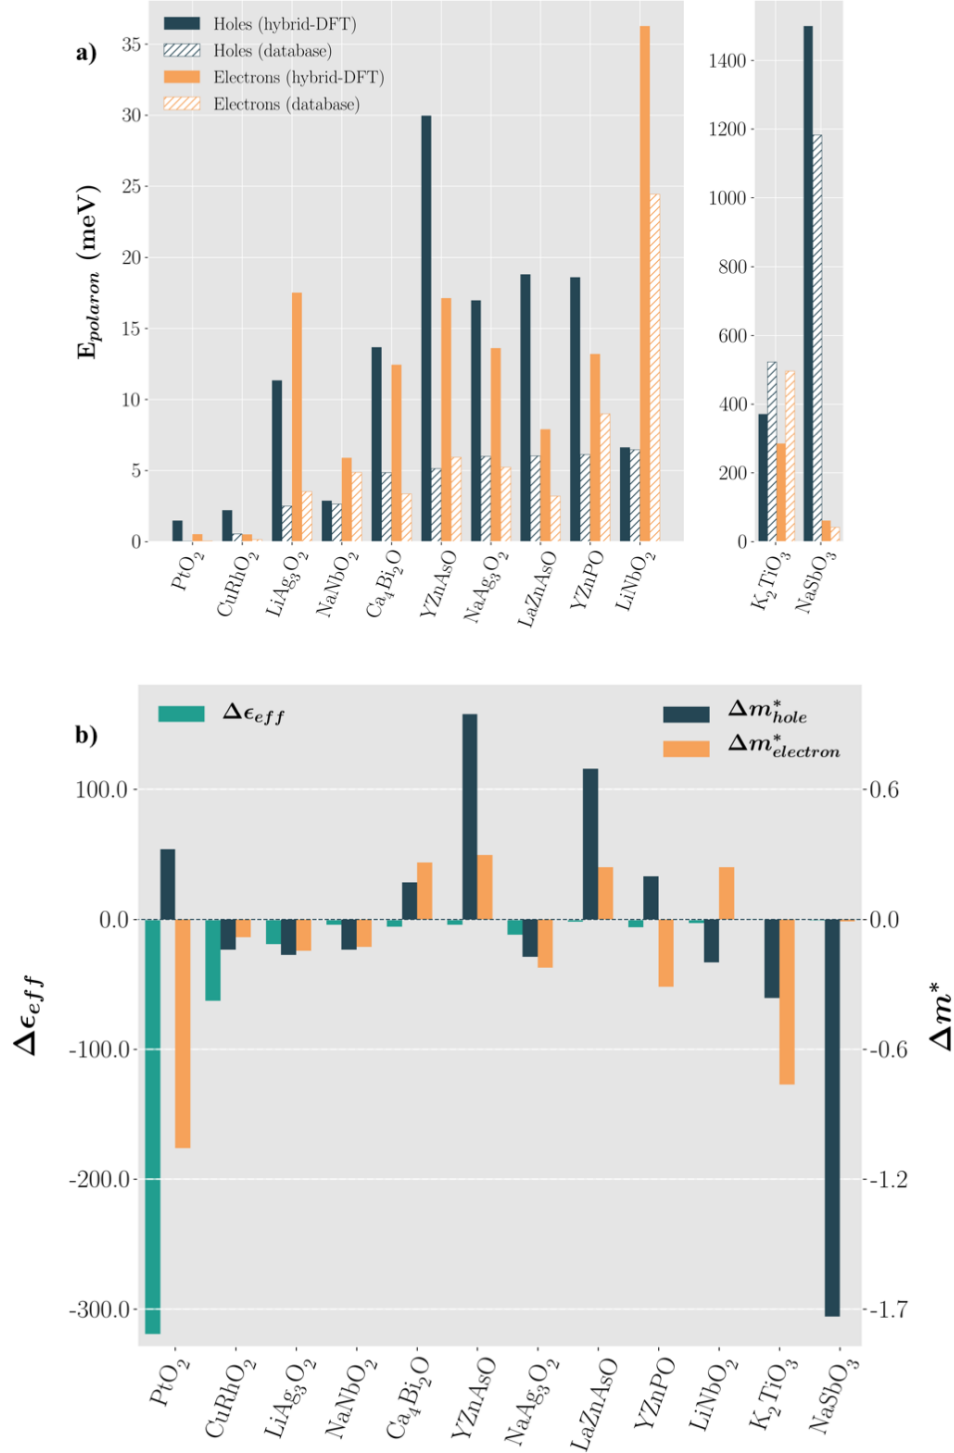

Figure S2: a) Polaron energy ( $E_{polaron}$ ) values as calculated using hybrid-DFT (solid bars) and database (hatched bars) for electrons (orange bars) and holes (blue bars). b) Absolute difference (database derived minus Hybrid-DFT derived) in  $\epsilon_{eff}$  (green bars) and effective mass ( $m^*$ ) for electrons (orange bars) and holes (blue bars).

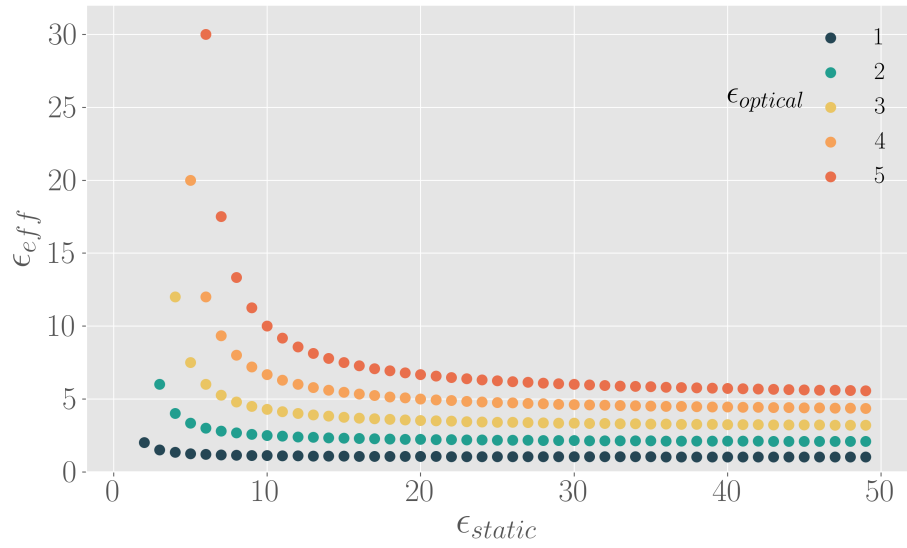

Figure S3: Visualization of the variation of  $\epsilon_{eff}$  (y-axis) with  $\epsilon_s$  (x-axis) at different fixed values of  $\epsilon_\infty$ . For  $\epsilon_s > 20$  the system is in a strong screening regime where  $\epsilon_{eff}$  shows little variation.
